# Supplementary material
Source: publisher figshare collection journal article supplement (https://karger.figshare.com/ndownloader/files/35902898)
Supplement: Supplementary file 1 [file 35902898]

**Supplementary Table 1:** Details of the antibodies used for multiplex immunofluorescence staining.

| **ANTIGEN** | **Supplier** | **PRODUCT NUMBER** | **CLONE** | **Positive control** | **Sequential staining**  **Matched with OPAL** | |
| --- | --- | --- | --- | --- | --- | --- |
| CD68 | DAKO | M0814 | KDI | **Tonsil, breast cancer** | **1:400** | **OPAL 690**  **1:400** |
| CD4 | LEICA | NCL-L-CD4-368 | 4B12 | **Tonsil, breast cancer** | **1:50** | **OPAL 520 1:400** |
| CD8 | LEICA | NCL-L-CD8-4311 | 4B11 | **Prostate, breast cancer** | **1:400** | **OPAL 570 1:400** |
| CD20 | LEICA | NCL-L-CD20-L26 | L26 | **Tonsil, breast cancer** | **1:200** | **OPAL 620 1:200** |
| FOXP3 | ABCAM | AB20034 | 236A/E7 | **Tonsil, breast cancer** | **1:400** | **OPAL 650 1:400** |
